# Supplementary material
Source: PubMed Central journal article supplement (PMC4994189)

FadyMohsen-4d-DMSO-13C-11-9-2012

Archive directory: /export/home/vnmr1/vnmrsys/data  
Sample directory: MSobhy-4-13C-dms0\_06Jun2004  
File: CARBON

Pulse Sequence: s2pu1  
Solvent: DMSO  
Temp. 30.0 C / 303.1 K  
Mercury-300BB "NMR300"

Relax. delay 1.000 sec  
Pulse 45.0 degrees  
Acq. time 1.815 sec  
Width 18863.1 Hz  
1500 repetitions  
OBSERVE C13, 75.4523378 MHz  
DECOUPLE H1, 300.0702829 MHz  
Power 44 dB  
continuously on  
WALTZ-16 modulated  
DATA PROCESSING  
Line broadening 1.0 Hz  
F1 size 131072  
Total time 54 hr, 19 min, 11 sec

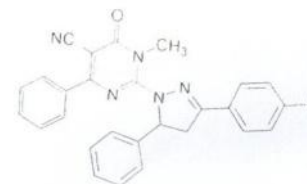

5d

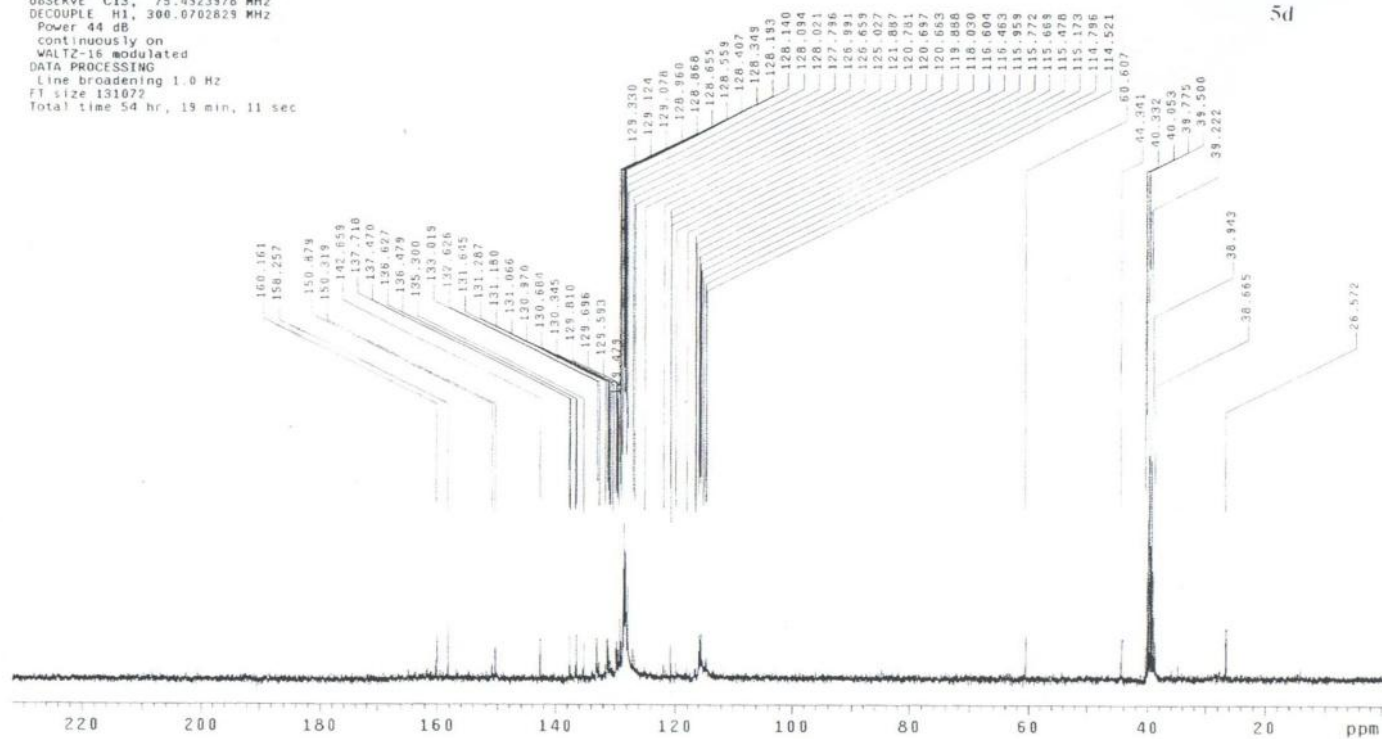

Dr. Fady Mousen-Sa-Hi-CDC13-Main, Defence, Chemical, Laboratory

Pulse Sequence: s2pu1  
Solvent: CDCl3  
Ambient temperature  
GEMINI-300BB "NMR"

Relax. delay 1.000 sec  
Pulse 11.2 degrees  
Acq. time 1.336 sec  
Width 8000.0 Hz  
37 repetitions  
OBSERVE H1: 300.0185236 MHz  
DATA PROCESSING  
FT size 32768  
Total time 11 min, 0 sec

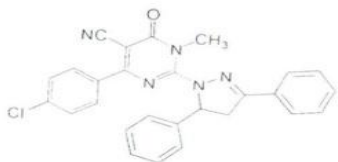

6a

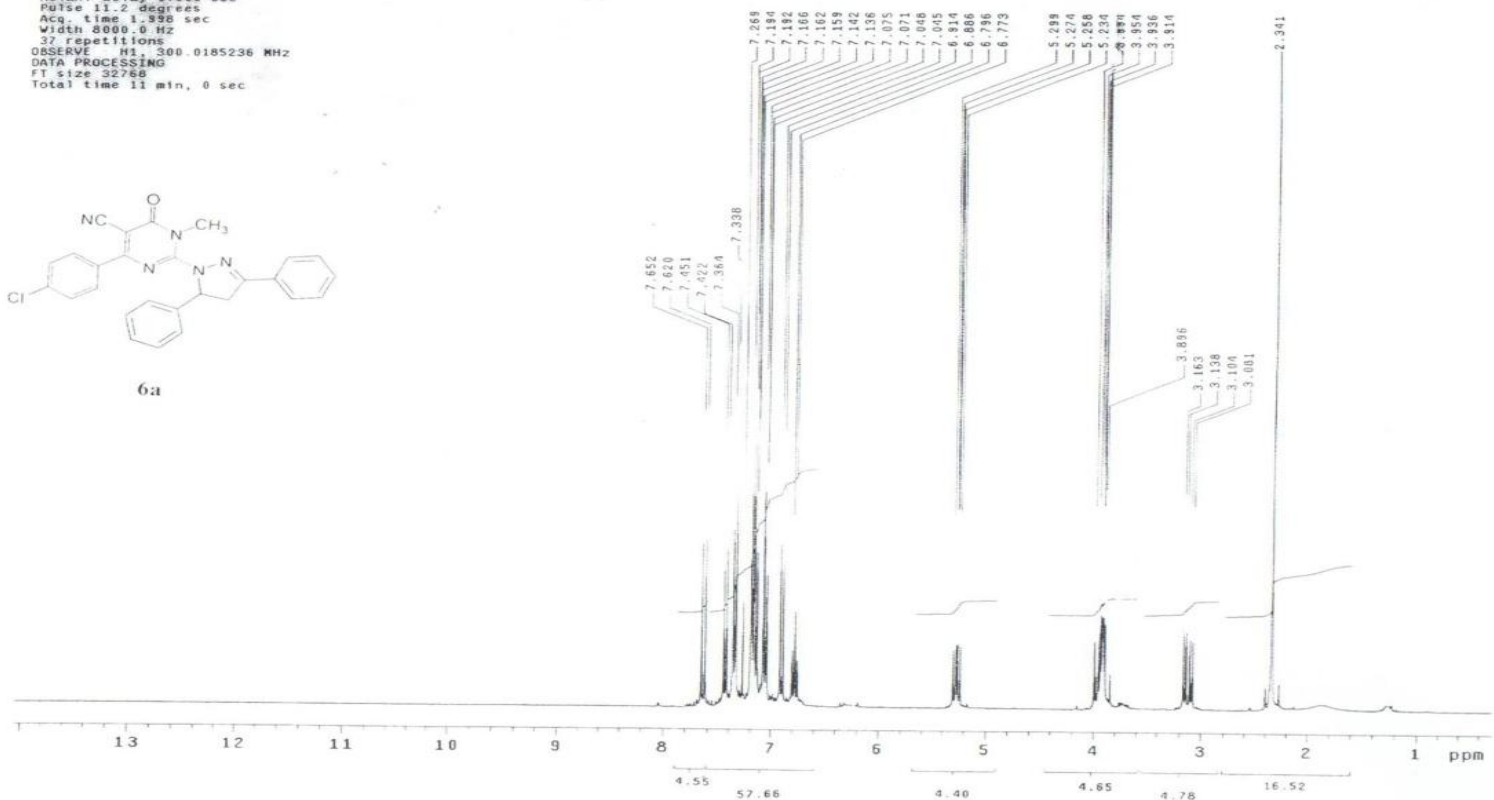

Archive directory: /export/home/vnmr1/vnmrsys/data  
Sample directory: MSobhy-4-13C-dms0\_06Jun2004  
File: CARBON

File Sequence: s2pu1  
Solvent: DMSO  
Temp. 30.0 C / 303.1 K  
Mercury-300BB "NMR300"

Relax. delay 1.000 sec  
Pulse 45.0 degrees  
Acq. time 1.815 sec  
Width 18863.1 Hz  
50000 repetitions  
BSERVE C13, 75.4523958 MHz  
ECOUPLE H1, 300.0702829 MHz  
Power 44 dB  
continuously on  
WALTZ-16 modulated  
DATA PROCESSING  
Line broadening 1.0 Hz  
T size 131072  
Total time 54 hr, 19 min, 11 sec

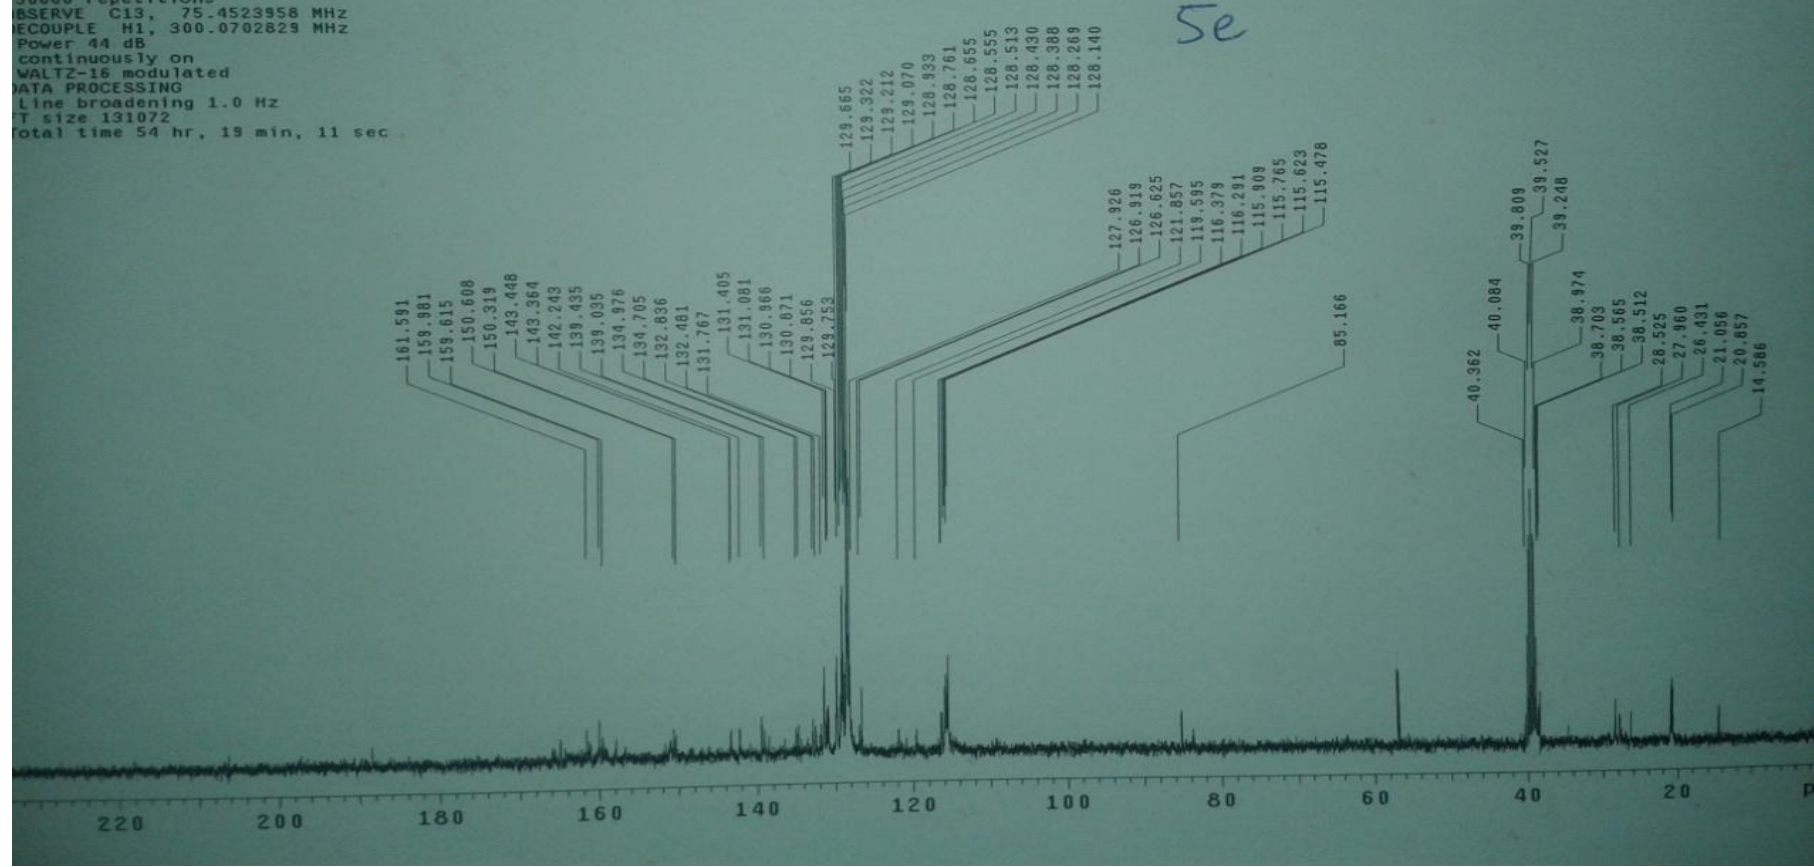

adyMohsen-4C-DMSO-13C-9-9-2012

Archive directory: /export/home/vnmr1/vnmrSYS/data  
Sample directory: MSobhy-4-13C-dms0\_06Jun2004  
File: CARBON

ulse Sequence: s2pu1

Solvent: DMSO  
Temp. 30.0 C / 303.1 K  
Mercury-300BB "NMR300"

Relax. delay 1.000 sec  
Pulse 45.0 degrees  
Acq. time 1.815 sec  
Width 18863.1 Hz  
1284 repetitions  
OBSERVE C13, 75.4523967 MHz  
DECUPLE H1, 300.0702829 MHz  
Power 44 dB  
continuously on  
WALTZ-16 modulated  
DATA PROCESSING  
Line broadening 1.0 Hz  
FT size 131072  
Total time 54 hr, 19 min, 11 sec

5c

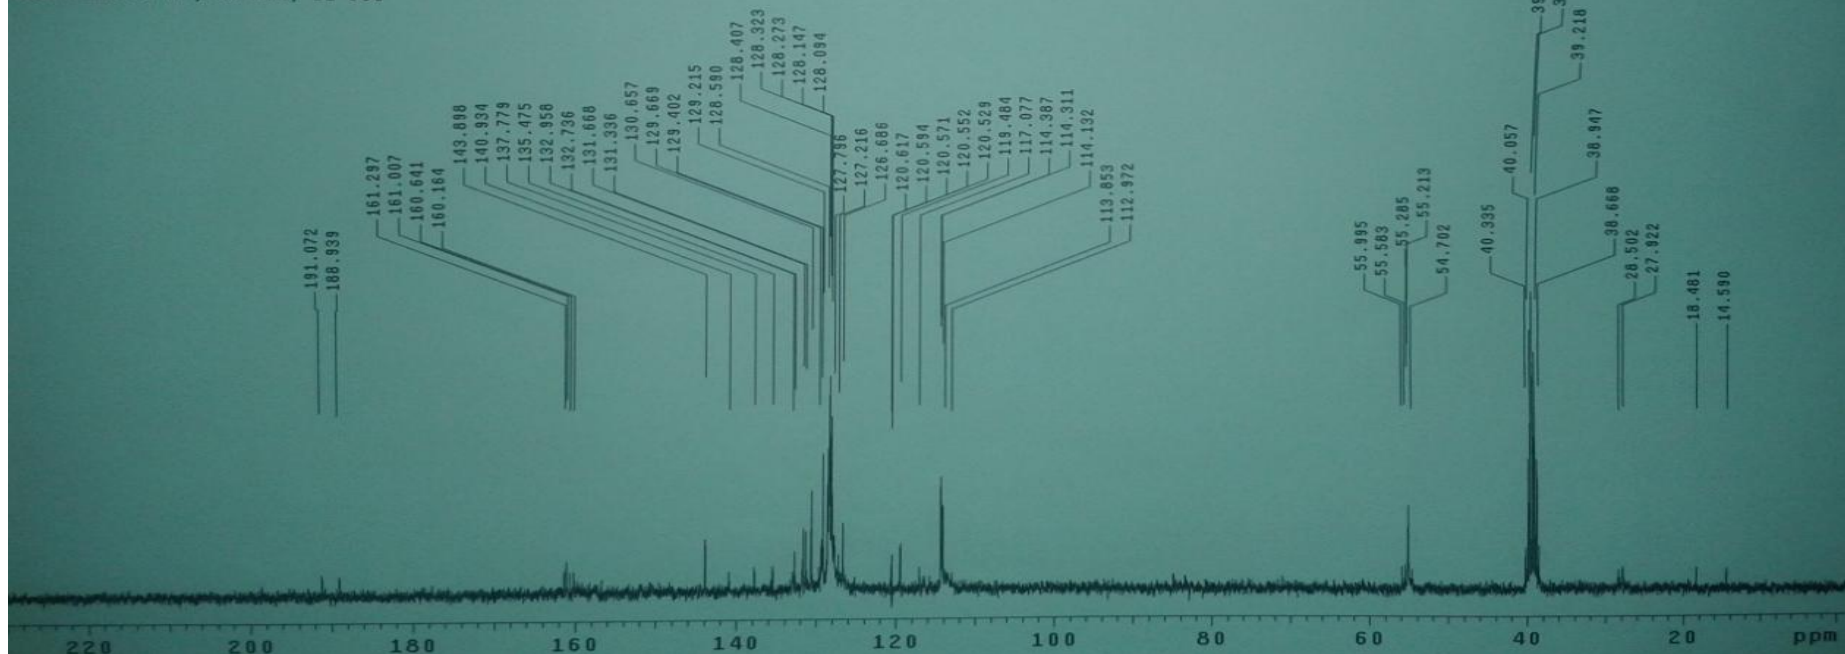

Pulse Sequence: s2pul  
Solvent: CDCl3  
Temp: 30.0 C / 303.1 K  
Mercury-30088 "NMR300"

Relax. delay 1.000 sec  
Pulse 74.1 degrees  
Acq. time 4.007 sec  
Width 9000.0 Hz  
23 repetitions  
RESERVE H1, 300.0673626 MHz  
DATA PROCESSING  
F size 131072  
Total time 31 min, 41 sec

6c

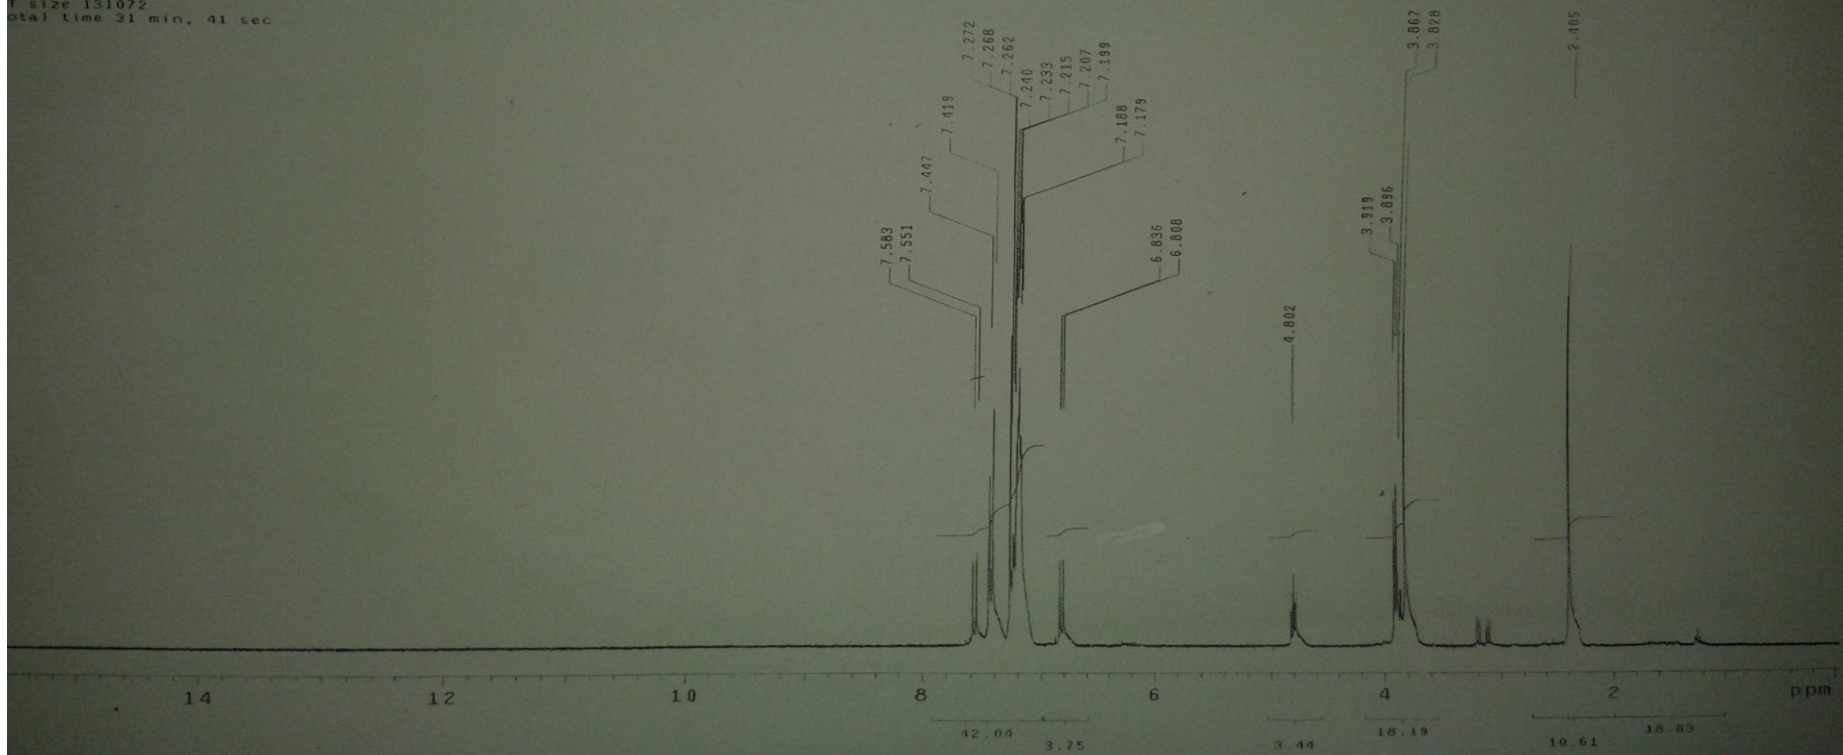

Archive directory: /export/home/vnmr1/vnmrsys/data  
Sample directory: MSobhy-4-13C  
File: CARBON

Pulse Sequence: s2pu1  
Solvent: DMSO  
Temp. 30.0 C / 303.1 K  
Mercury-300BB "NMR300"

6C

Relax. delay 1.000 sec  
Pulse 45.0 degrees  
Acq. time 1.815 sec  
Width 18863.1 Hz  
1460 repetitions  
OBSERVE C13, 75.4523958 MHz  
DECOUPLE H1, 300.0702829 MHz  
Power 44 dB  
continuously on  
WALTZ-16 modulated  
DATA PROCESSING  
Line broadening 1.0 Hz  
FT size 131072  
Total time 54 hr, 19 min, 11 sec

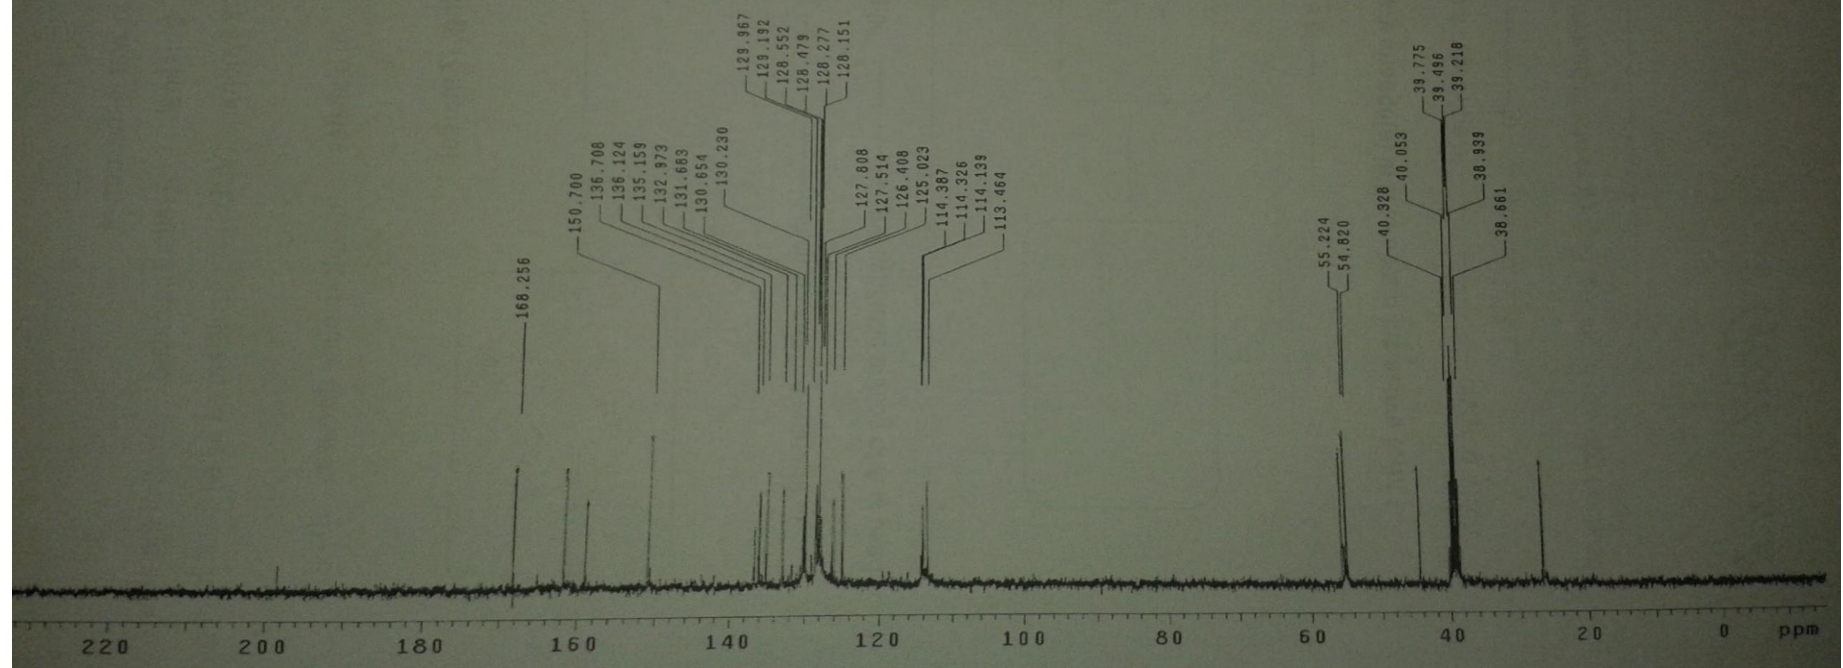

ulse Sequence: s2pul  
Solvent: CDC13  
Temp. 30.0 C / 303.1 K  
Mercury-300BB "NMR300"

6b

Relax. delay 1.000 sec  
Pulse 74.1 degrees  
Acq. time 4.007 sec  
Width 9000.0 Hz  
200 repetitions  
BSERVE H1, 300.0673626 MHz  
ATA PROCESSING  
T size 131072  
Total time 31 min, 41 sec

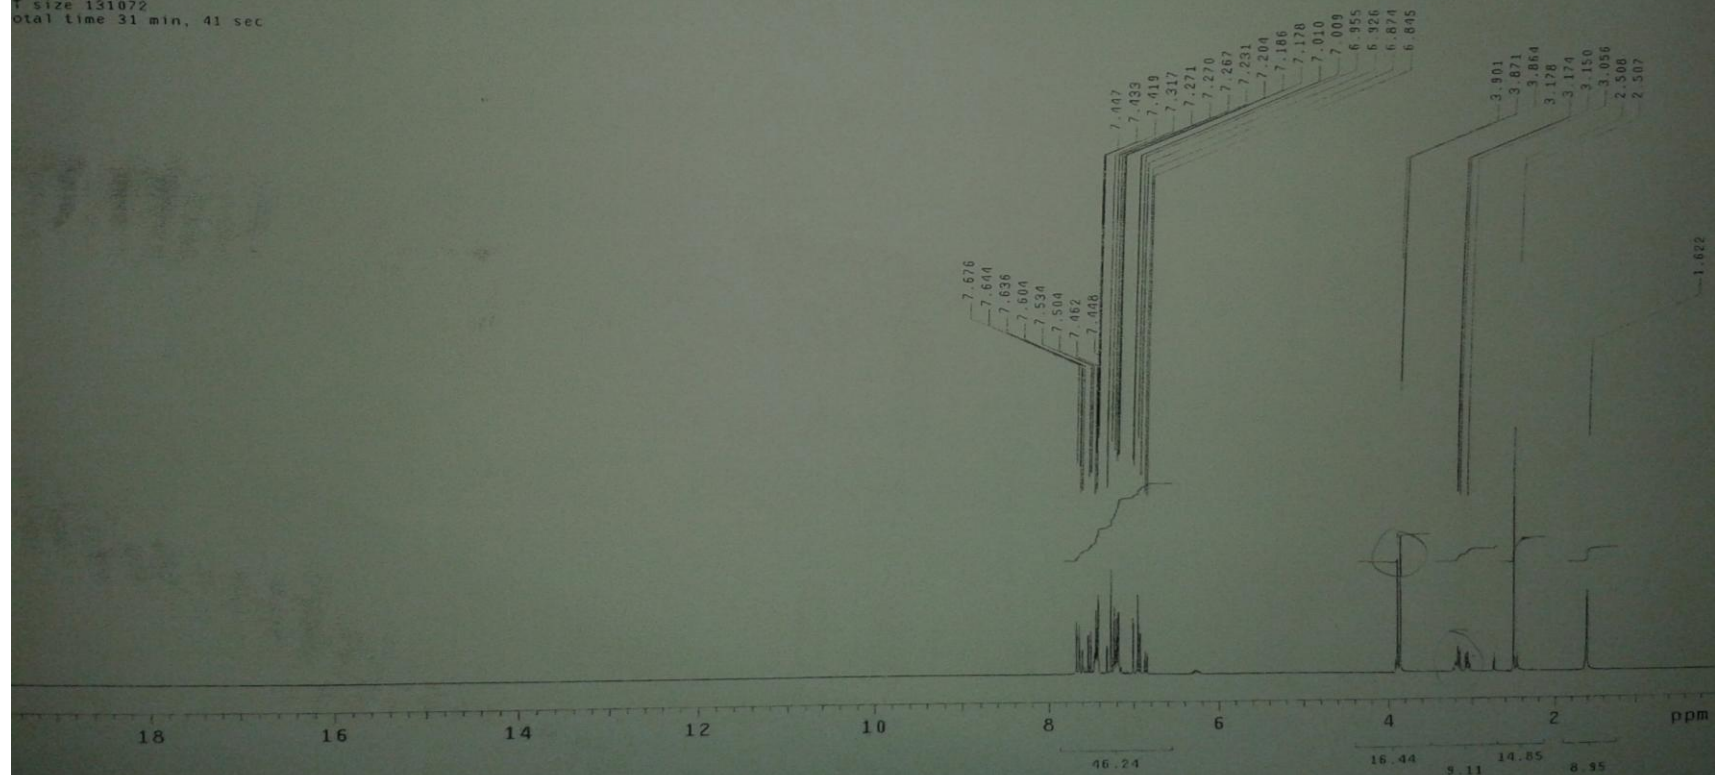

Pulse Sequence: s2pul  
Solvent: CDCl3  
Temp. 30.0 C / 303.1 K  
Mercury-300BB "NMR300"

Relax. delay 1.000 sec  
Pulse 74.1 degrees  
Acq. time 4.007 sec  
Width 3000.0 Hz  
6 repetitions  
OBSERVE H1, 300.0673626 MHz  
DATA PROCESSING  
FT size 131072  
Total time 31 min, 41 sec

5h

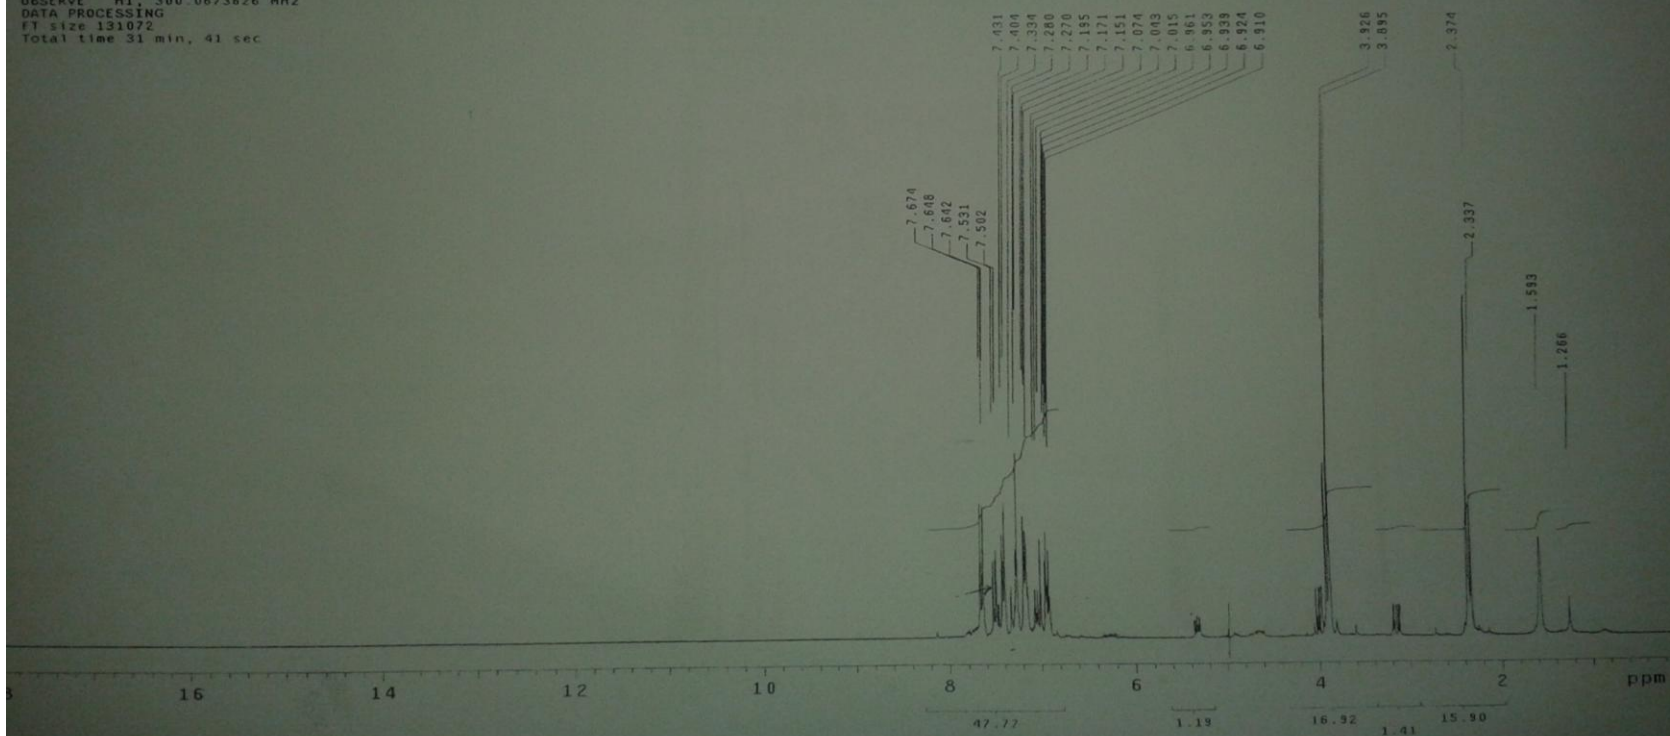



Pulse Sequence: s2pul  
Solvent: CDCl3  
Temp: 30.0 C / 303.1 K  
Mercury-300BB "NMR300"

5g

Relax. delay 1.000 sec  
Pulse 74.1 degrees  
Acq. time 4.007 sec  
Width 9000.0 Hz  
52 repetitions  
OBSERVE H1, 300.0673626 MHz  
DATA PROCESSING  
f1 size 131072  
Total time 31 min, 41 sec

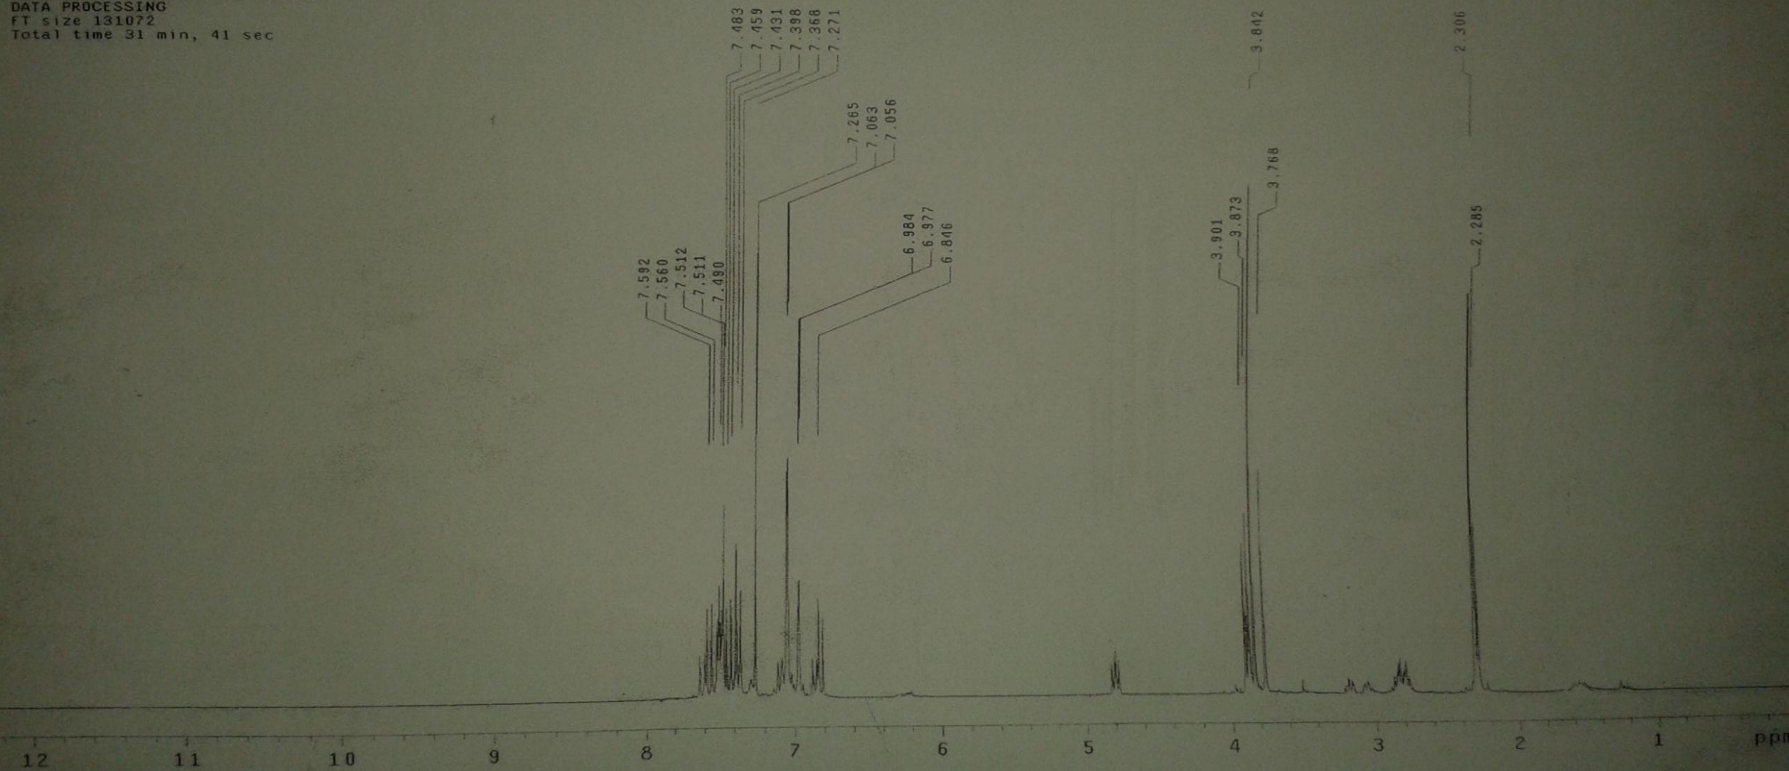

Pulse Sequence: s2pul  
Solvent: CDCl3  
Temp. 30.0 C / 303.1 K  
Mercury-300BB "NMR300"

Relax. delay 1.000 sec  
Pulse 74.1 degrees  
Acq. time 4.007 sec  
Width 9000.0 Hz  
20 repetitions  
OBSERVE H1 300.0673626 MHz  
DATA PROCESSING  
FT size 131072  
Total time 31 min, 41 sec

6h

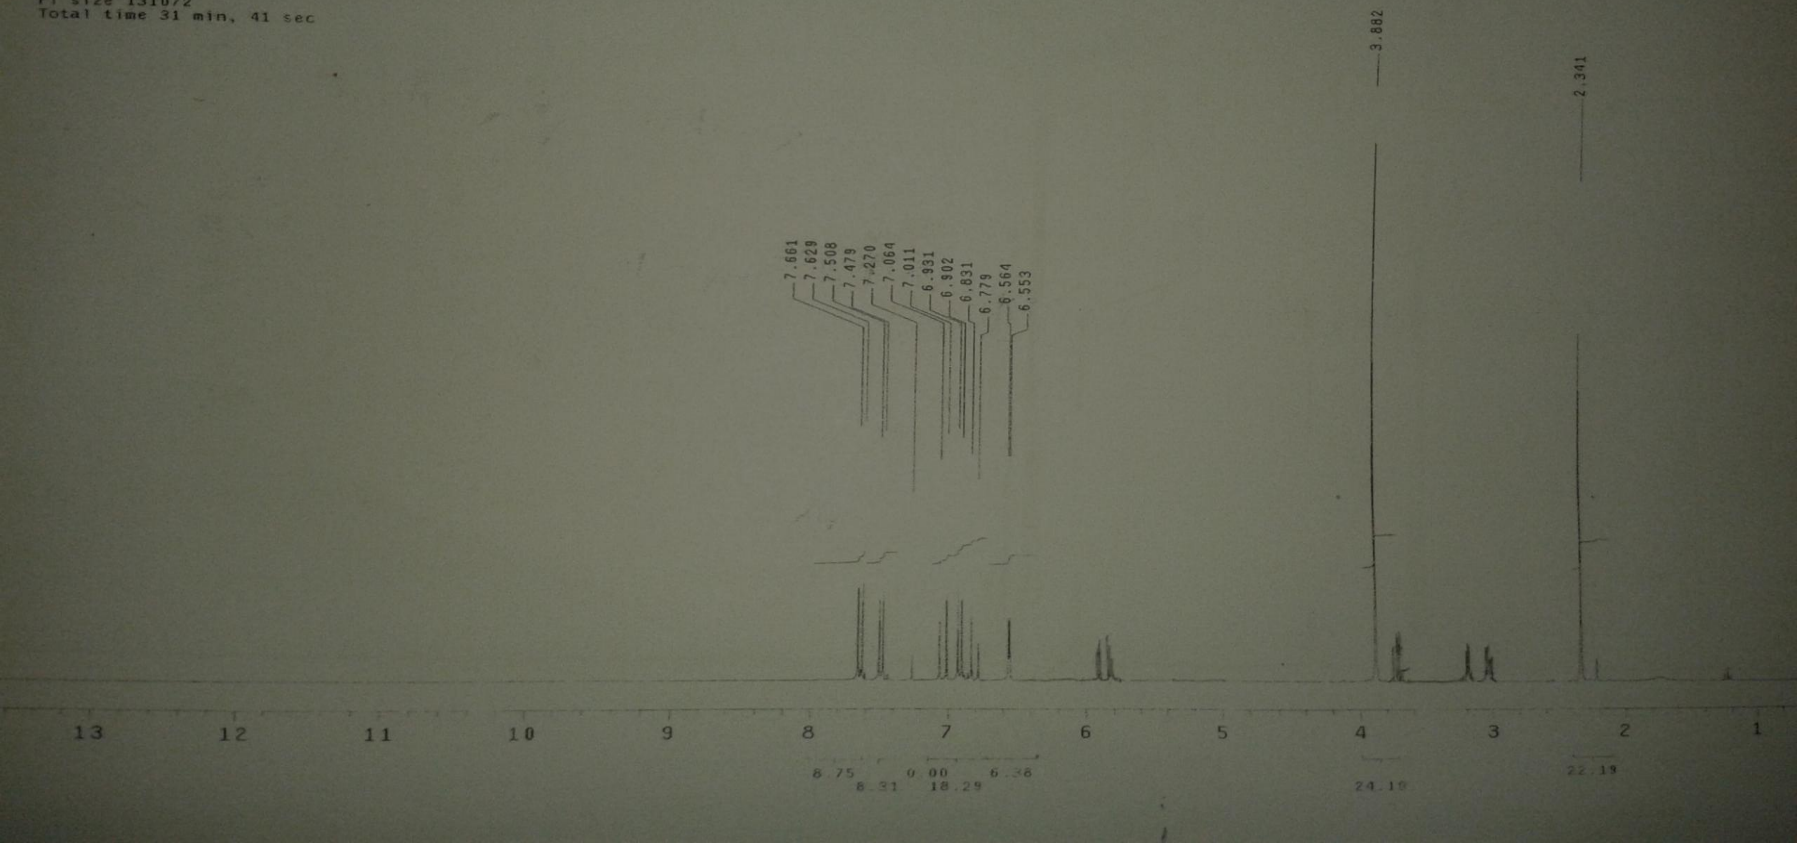

Supplement: NIHMS800142-supplement-Supplement.pdf [file NIHMS800142-supplement-Supplement.pdf]
